# Supplementary material for: Impact of the sintering additive Li3PO4 on the sintering behaviour, microstructure and electrical properties of a ceramic LATP electrolyte
Source: Royal Society of Chemistry journal article supplement (doi:10.1039/d2ma00655c), 2022-01-01
Supplement: d2ma00655c1.pdf [file d2ma00655c1.pdf]

## Supplementary information for

### How $\text{Li}_3\text{PO}_4$ affects Sintering Behavior, Microstructure and Electrical Properties of the ceramic LATP Electrolyte

Matthias Rumpel,<sup>\*a</sup> Lavinia Appold,<sup>a</sup> Jens Baber,<sup>b</sup> Werner Stracke,<sup>a</sup> Andreas Flegler<sup>a</sup> and Gerhard Sextl<sup>a</sup>

Fraunhofer Institute for Silicate Research ISC, *Center for Electromobility*, Neunerplatz 2, 97082 Wuerzburg, Germany<sup>a</sup>

Fraunhofer Institute for Silicate Research ISC, *Center for High Temperature Materials and Design HTL*, Gottlieb-Keim-Str. 62, 95448 Bayreuth, Germany<sup>b</sup>

#### S1: SEM images of synthesized LATP powder

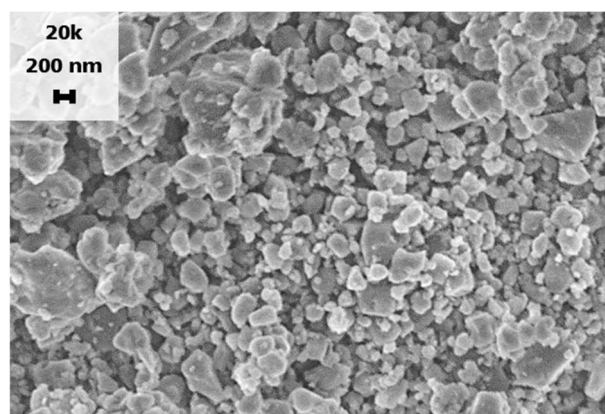

Fig. S1 LATP powder after crystallization at 800 °C for 5 h and ball milling. The particle size distribution is 200 nm - 600 nm.

## S2: Data of thermal-optical measurements

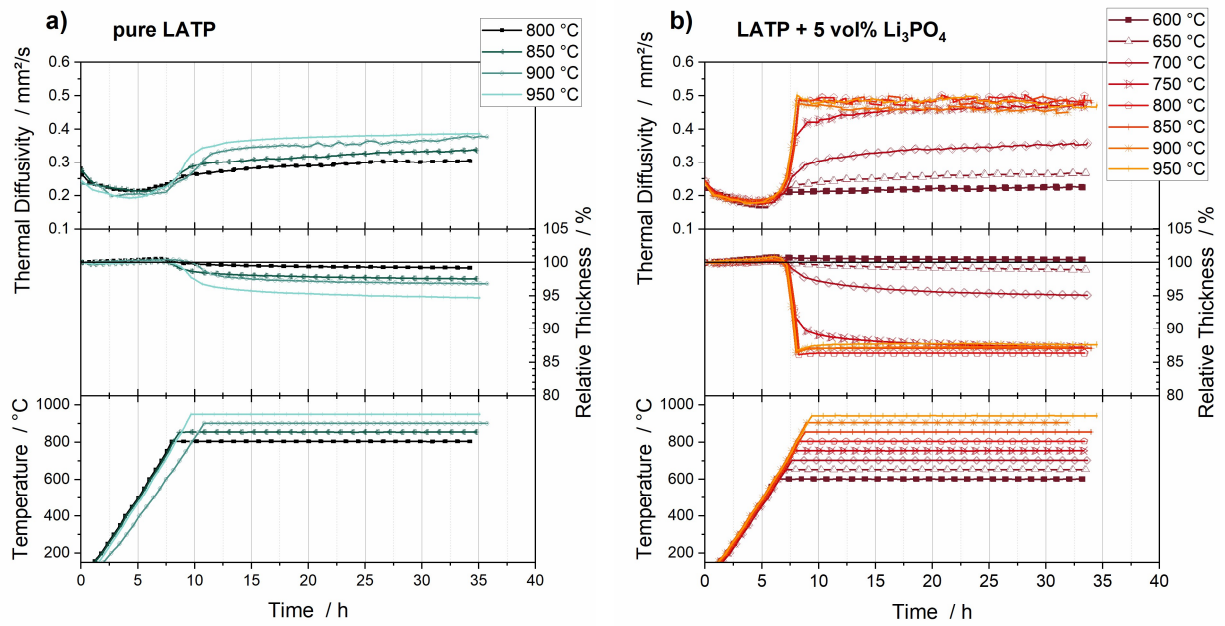

Fig. S2 Thermal diffusivities, relative densities and temperature profile as function of time of a) the pure LAMP samples sintered between 800 °C and 950 °C and b) the LAMP + 5 vol% Li<sub>3</sub>PO<sub>4</sub> samples sintered between 600 °C and 950 °C.

**S3: Arrhenius plots obtained by temperature-dependent electrical impedance spectroscopy**

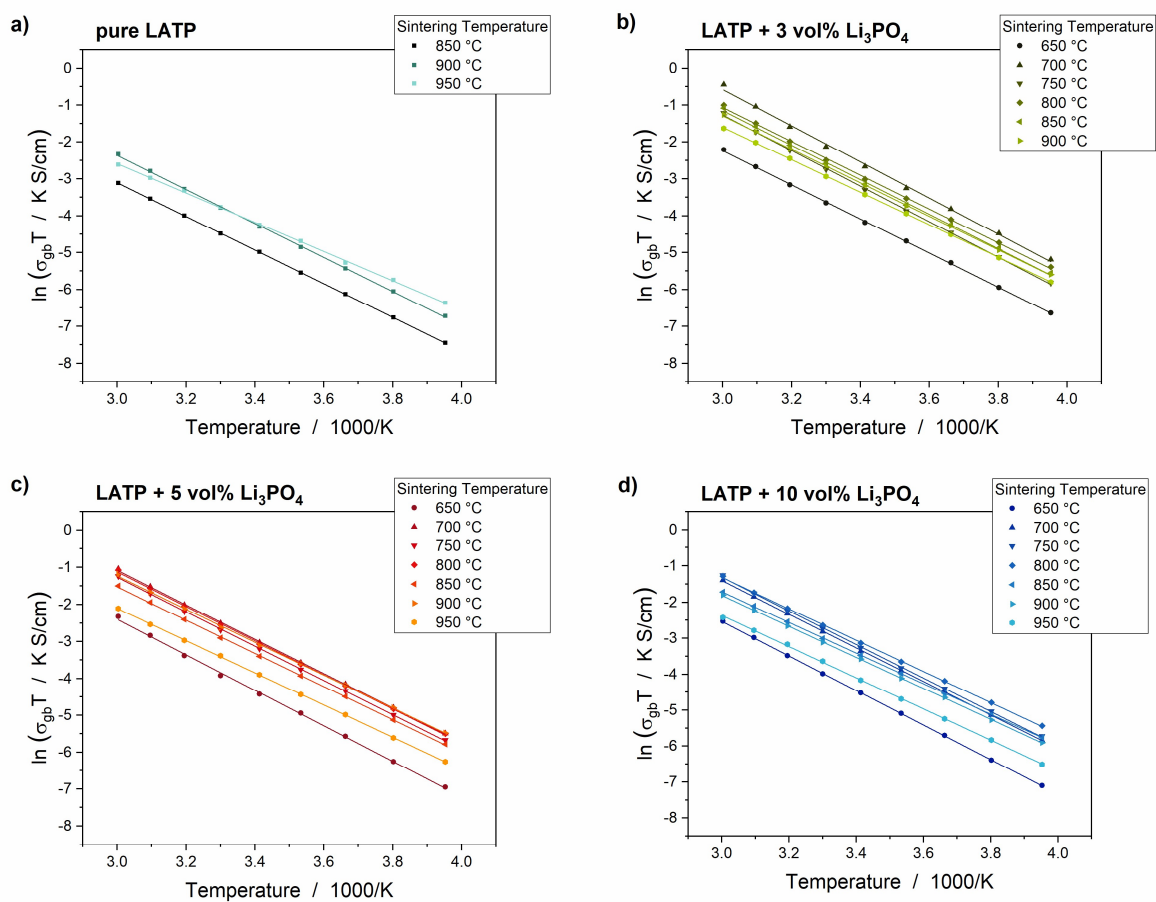

Fig S3 Arrhenius plots obtained from the temperature-dependent EIS measurements of a) pure LTP, b) LTP + 3 vol%  $\text{Li}_3\text{PO}_4$ , c) LTP + 5 vol%  $\text{Li}_3\text{PO}_4$  and d) LTP + 10 vol%  $\text{Li}_3\text{PO}_4$ . The solid lines represent the linear fits.
